# Supplementary material
Source: Elsevier journal article supplement (https://www.sciencedirect.com/science/article/pii/S1695403320301727)
Supplement: mmc1 [file S1695403320301727:mmc1.docx]

**ANPEDIA-20-233**

**E-APPENDED**

**REVISIÓN NARRATIVA SOBRE LA RESPUESTA INMUNITARIA FRENTE A CORONAVIRUS: DESCRIPCIÓN GENERAL, APLICABILIDAD PARA SARS-COV2 E IMPLICACIONES TERAPÉUTICAS**

**Título abreviado:** Inmunidad y coronavirus

Alberto García-Salido

Servicio de Cuidados Intensivos Pediátricos. Hospital Infantil Universitario Niño Jesús. Madrid, España.

Correo electrónico: [citopensis@yahoo.es](mailto:citopensis@yahoo.es)

El nuevo coronavirus (SARS-CoV2) productor de síndrome respiratorio agudo severo surge en Wuhan en diciembre de 2019. Genera la denominada enfermedad por coronavirus 2019 (COVID-19) y ha llevado a la declaración de emergencia de salud pública global a la Organización Mundial de la Salud. Este nuevo virus SARS-CoV2 podría compartir características y respuesta inmune a las descritas para otros coronavirus. Dada su actividad sobre la vía del interferón y el modo en el que disregula la inmunidad innata el uso de tratamientos dirigidos a modular o contener ésta pueden ser de interés. Se realiza una revisión narrativa de la evidencia actual acerca de la inmunidad sobre coronavirus y su aplicabilidad para SARS-CoV2. Se describe también la fisiopatogenia y la actividad leucocitaria subyacente con intención de clarificar la posible utilidad de biomarcadores inflamatorios y el desarrollo de tratamientos personalizados.

**Palabras clave:** Coronavirus; SARSCOV2; COVID19; inmunidad
